# Supplementary material
Source: MDPI journal article supplement (https://www.mdpi.com/2076-3387/9/2/45)
Supplement: s1 [file s1]

## Sheet: Form Responses 1
Timestamp	Er du Turleder for DNT	Var du deltaker eller turleder på denne turen?	Ønsker du mer eller mindre innslag av konkurranse under turen?	Ønsker du at turforløpet, strukturen og roller skal være mere eller mindre fremtredende under turen?	Ønsker du mer eller mindre individuelle tilbakemeldinger angående valgene du som deltaker tok under turen?	Ønsker du mer eller mindre fysisk aktivitet under turen?	Ønsker du som deltaker mer eller mindre innflytelse på turforløpet (f.eks. rutetraséen, antall pauser)?	Ønsker du flere eller færre sosiale aktiviteter under turen?	Ønsker du mer eller mindre synlige bevis av hva du som deltaker oppnådde under turen?	Ønsker du flere eller færre muligheter til selv å utforske naturen under turen?	Jeg likte turen.	Turen ga meg en positiv utfordring.	Turen ga meg en fin naturopplevelse	Jeg anbefaler turen til andre	Kjønn	Alder
8/22/2017 21:45:03	Ja	Turleder (jeg svarer hva jeg tror flertallet av deltakerne mener)	3	3	3	3	2	3	3	3	4	3	5		Mann	40-59
8/22/2017 23:15:57	Ja	Turleder (jeg svarer hva jeg tror flertallet av deltakerne mener)	2	3	3	3	3	3	4	3	4	4	4		Kvinne	60-74
8/23/2017 5:47:47	Ja	Turleder (jeg svarer hva jeg tror flertallet av deltakerne mener)	3	3	3	4	4	2	2	5	5	4	5		Kvinne	40-59
8/23/2017 6:20:12	Ja	Turleder (jeg svarer hva jeg tror flertallet av deltakerne mener)	2	3	3	3	3	3	3	3	3	3	3		Mann	60-74
8/23/2017 6:55:40	Ja	Deltaker	2	3	4	3	3	4	3	4	4	4	4		Mann	40-59
8/23/2017 7:39:29	Ja	Turleder (jeg svarer hva jeg tror flertallet av deltakerne mener)	3	3	3	3	3	3	3	3	4	3	3		Kvinne	40-59
8/23/2017 9:10:14	Ja	Turleder (jeg svarer hva jeg tror flertallet av deltakerne mener)	2	3	3	3	3	3	3	3	4	4	5		Kvinne	60-74
8/23/2017 9:46:53	Ja	Deltaker	2	4	4	3	2	3	3	3	4	2	4		Mann	60-74
8/23/2017 11:14:38	Ja	Turleder (jeg svarer hva jeg tror flertallet av deltakerne mener)	2	3	4	3	4	3	3	3	5	5	5		Mann	60-74
8/23/2017 19:43:37	Ja	Turleder (jeg svarer hva jeg tror flertallet av deltakerne mener)	3	3	3	3	2	4	3	4	5	4	5		Mann	40-59
8/23/2017 21:16:36	Ja	Turleder (jeg svarer hva jeg tror flertallet av deltakerne mener)	2	3	2	4	2	4	4	2	5	4	4		Mann	25-39
8/28/2017 10:47:59	Ja	Turleder (jeg svarer hva jeg tror flertallet av deltakerne mener)	3	3	4	3	3	2	3	3	5	4	5		Mann	40-59
9/1/2017 23:26:13	Ja	Turleder (jeg svarer hva jeg tror flertallet av deltakerne mener)	3	3	3	3	3	3	3	3	5	4	5	5	Mann	40-59
9/1/2017 23:27:13	Nei		3	3	3	3	3	3	3	3	4	4	4	4	Kvinne	40-59
9/1/2017 23:37:51	Nei		3	3	1	2	3	3	1	3	5	5	5	5	Kvinne	40-59
9/2/2017 0:18:21	Nei		3	3	3	3	3	3	3	3	5	4	5	5	Kvinne	25-39
9/6/2017 22:15:06	Nei		3	3	4	3	3	3	3	3	5	5	5	5	Mann	25-39
9/6/2017 22:26:23	Ja	Deltaker	2	3	3	4	2	3	4	3	5	5	5	5	Kvinne	60-74
9/7/2017 7:44:53	Ja	Turleder (jeg svarer hva jeg tror flertallet av deltakerne mener)	3	3	2	3	2	3	2	2	5	5	5	5	Kvinne	60-74
9/7/2017 9:24:43	Nei		3	3	3	3	4	4	3	4	5	4	5	5	Mann	25-39
9/7/2017 9:33:02	Ja	Turleder (jeg svarer hva jeg tror flertallet av deltakerne mener)	3	3	3	3	3	3	3	3	5	5	5	5	Mann	60-74
9/13/2017 18:04:27	Ja	Deltaker	3	3	3	3	3	3	3	3	5	5	5	5	Mann	60-74
9/13/2017 18:05:30	Ja	Turleder (jeg svarer hva jeg tror flertallet av deltakerne mener)	1	1	4	3	3	3	3	3	5	5	5	5	Kvinne	60-74
9/14/2017 19:31:45	Ja	Turleder (jeg svarer hva jeg tror flertallet av deltakerne mener)	1	3	3	3	3	3	3	3	4	4	4	4	Kvinne	60-74
			c	n	i	p	u	s	a	e
average -3		-0.04	-0.50	-0.04	0.08	0.08	-0.13	0.08	-0.04	0.13
average			2.50	2.96	3.08	3.08	2.88	3.08	2.96	3.13	4.58	4.13	4.58	4.83
median			3	3	3	3	3	3	3	3	5	4	5	5
10%			2	3	2.3	3	2	3	2.3	3	4	3	4	4.1
90%			3	3	4	3.7	3.7	4	3.7	4	5	5	5	5
positive			0%	4%	25%	13%	13%	17%	13%	17%	96%	83%	92%	100%
stay			58%	92%	63%	83%	63%	75%	75%	75%	4%	13%	8%	0%
negative			42%	4%	13%	4%	25%	8%	13%	8%	0%	4%	0%	0%
variance		0.04	0.43	0.22	0.51	0.17	0.38	0.25	0.39	0.38	0.34	0.64	0.43	0.15
		0.04
++			0%	0%	0%	0%	0%	0%	0%	4%	63%	33%	67%	83%
+			0%	4%	25%	13%	13%	17%	13%	13%	33%	50%	25%	17%
0			58%	92%	63%	83%	63%	75%	75%	75%	4%	13%	8%	0%
-			33%	0%	8%	4%	25%	8%	8%	8%	0%	4%	0%	0%
--			8%	4%	4%	0%	0%	0%	4%	0%	0%	0%	0%	0%
															11	4
															13	9
																11
